# Supplementary material for: Finding Meanings in Low Dimensional Structures: Stochastic Neighbor Embedding Applied to the Analysis of Indri indri Vocal Repertoire
Source: MDPI journal article supplement (doi:10.3390/ani9050243), 2019-05-15
Supplement: s1 [file s1]

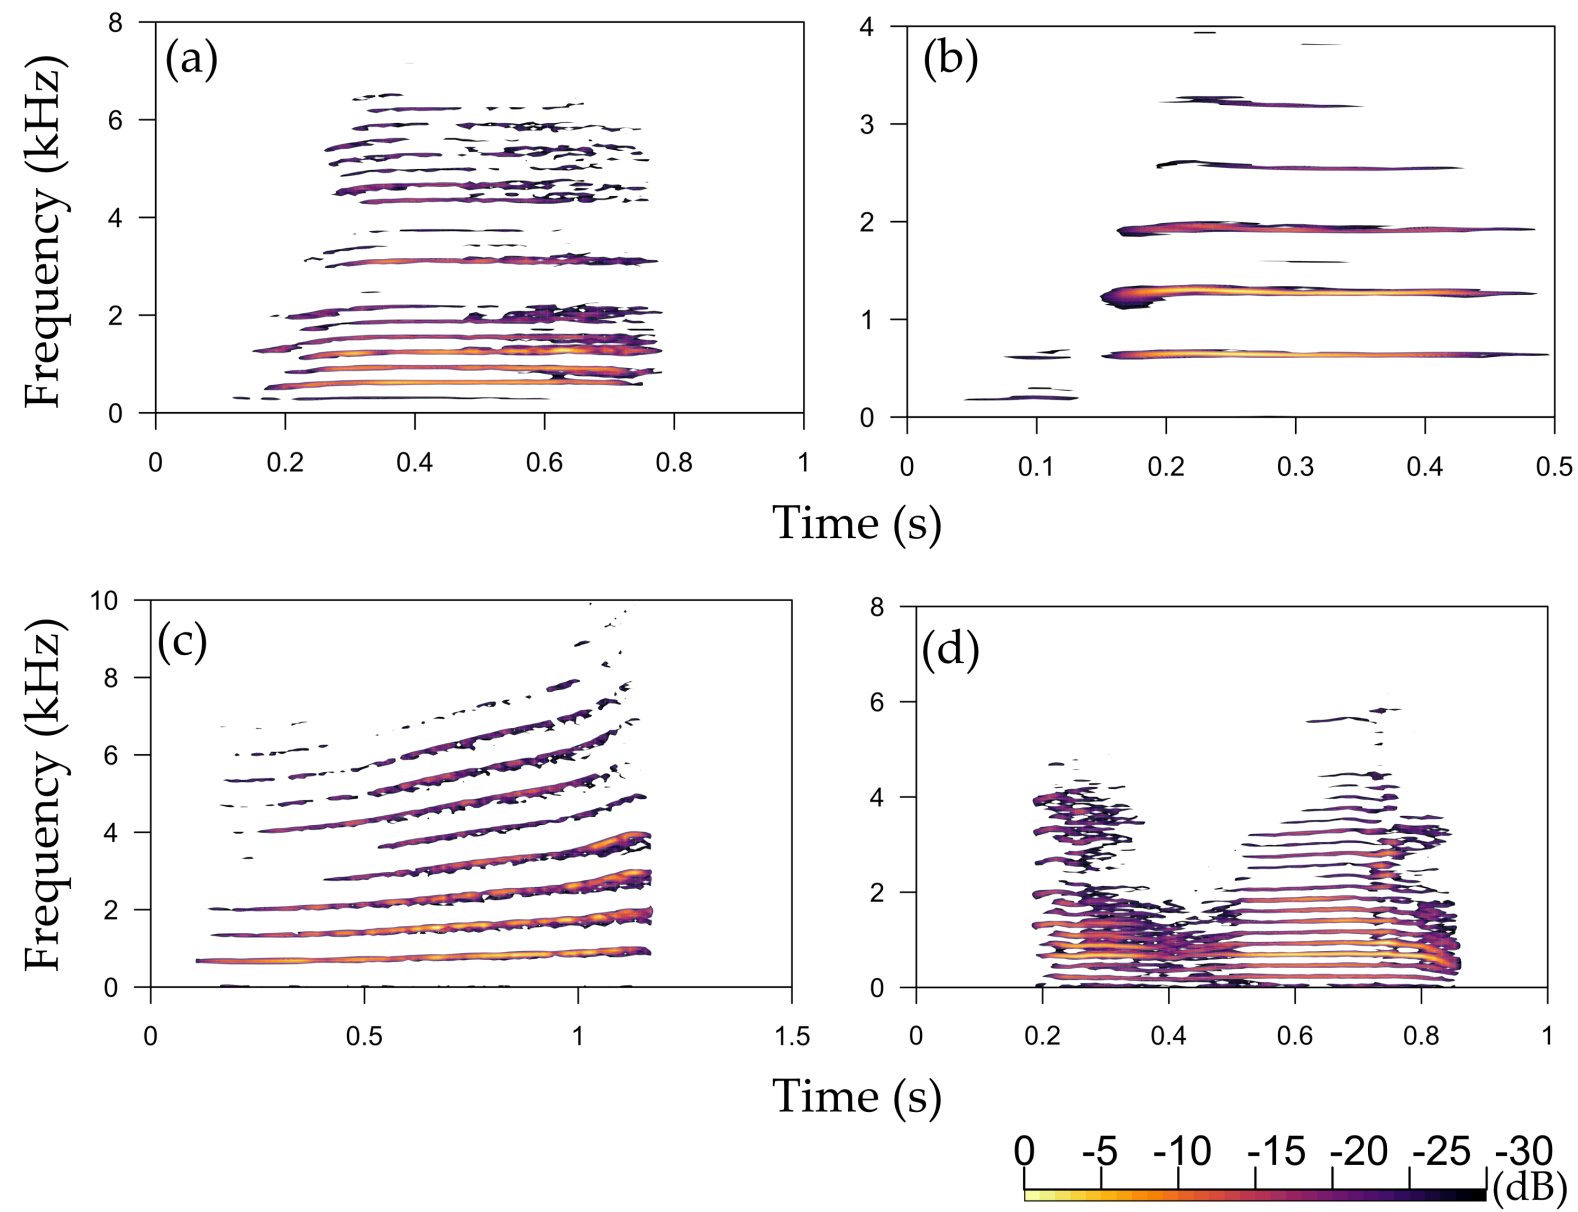

Figure S2: Sound spectrograms of *Indri indri* vocal types. **(a)** Roar; **(b)** Clacson; **(c)** Songbit; **(d)** Long Tonal Call. All spectrograms were generated in R [43] through the Seewave package [48,49], using a Hanning window, 512 samples, 0% overlap, no zero-padding. Spectrograms of roar **(a)** and long tonal call **(d)** are produced with a different time scale (1s) compared to both of songbit **(c)**, 1.5s) and clacson **(b)**, 0.5s).
